# Supplementary material for: Association of Genomic Domains in BRCA1 and BRCA2 with Prostate Cancer Risk and Aggressiveness
Source: Oxford University Press journal article supplement (doi:10.1158/0008-5472.can-19-1840), 2019-11-13
Supplement: 00085472can191840-sup-223930_2_supp_5831381_pz82mw.docx [file 00085472can191840-sup-223930_2_supp_5831381_pz82mw.docx]

**Table 1 and Supplementary Table 1: BRCA1 and BRCA2 Mutation Carriers by Accrual Center**

| **Study** | **BRCA1** | **BRCA2** | **Total** |
| --- | --- | --- | --- |
| BCFR-AU | 7 | 10 | 17 |
| BCFR-NC | 6 | 10 | 16 |
| BCFR-NY | 36 | 18 | 54 |
| BCFR-ON | 29 | 19 | 48 |
| BCFR-UT | 68 | 56 | 124 |
| BFBOCC | 9 | 2 | 11 |
| BIDMC | 1 | 1 | 2 |
| BRICOH | 141 | 96 | 237 |
| CBCS | 153 | 103 | 256 |
| CEMIC | 0 | 2 | 2 |
| CNIO | 75 | 117 | 192 |
| COH | 3 | 2 | 5 |
| CONSIT TEAM | 204 | 238 | 442 |
| CZ-BRCA | 3 | 16 | 19 |
| DEMOKRITOS | 23 | 14 | 37 |
| DKFZ | 83 | 12 | 95 |
| EMBRACE | 393 | 458 | 851 |
| FCCC | 59 | 36 | 95 |
| G-FaST | 89 | 54 | 143 |
| GC-HBOC | 275 | 199 | 474 |
| GEMO | 131 | 127 | 258 |
| HCSC | 50 | 77 | 127 |
| HEBCS | 34 | 49 | 83 |
| HEBON | 146 | 43 | 189 |
| HRBCP | 11 | 30 | 41 |
| HUNBOCS | 25 | 24 | 49 |
| HVH | 30 | 50 | 80 |
| ICO | 153 | 169 | 322 |
| ILUH | 5 | 77 | 82 |
| IOVHBOCS | 51 | 60 | 111 |
| IPOBCS | 36 | 32 | 68 |
| KCONFAB | 313 | 240 | 553 |
| KOHBRA | 22 | 51 | 73 |
| MAYO | 17 | 9 | 26 |
| MSKCC | 53 | 71 | 124 |
| MUV | 54 | 26 | 80 |
| NCI | 61 | 18 | 79 |
| NorthShore | 0 | 2 | 2 |
| OCGN | 33 | 30 | 63 |
| OSU CCG | 11 | 14 | 25 |
| OUH | 267 | 193 | 460 |
| PBCS | 6 | 11 | 17 |
| SEABASS | 23 | 5 | 28 |
| SWE-BRCA | 53 | 22 | 75 |
| UCHICAGO | 38 | 45 | 83 |
| UPENN | 100 | 56 | 156 |
| UPITT | 7 | 15 | 22 |
| VFCTG | 66 | 42 | 108 |
| Total | 3453 | 3051 | 6504 |
