# Supplementary material for: Association of Genomic Domains in BRCA1 and BRCA2 with Prostate Cancer Risk and Aggressiveness
Source: Oxford University Press journal article supplement (doi:10.1158/0008-5472.can-19-1840), 2019-11-13
Supplement: 00085472can191840-sup-223930_2_supp_5831384_pz82mw.docx [file 00085472can191840-sup-223930_2_supp_5831384_pz82mw.docx]

**Table 3 and Supplementary Table 3: Nucleotide Boundaries for Analysis Bins Created for *BRCA1* and *BRCA2***

|  | **Bin Number** | **"Decile" Bin Definition** | **"Functional" Bin Definition** |
| --- | --- | --- | --- |
| *BRCA1* | 1 | < 81 | < 192 |
|  | 2 | 81 - 302 | 193 - 1034 |
|  | 3 | 303 - 1504 | 1035 - 2397 |
|  | 4 | 1505 - 2475 | 2398 - 3758 |
|  | 5 | 2476 - 3319 | 3759 - 4272 |
|  | 6 | 3320 - 3710 | 4273 - 5169 |
|  | 7 | 3711 - 4065 | 5170+ |
|  | 8 | 4066 - 5030 |  |
|  | 9 | 5031 - 5266 |  |
|  | 10 | 5267+ |  |
|  |  |  |  |
| *BRCA2* | 1 | < 755 | < 1000 |
|  | 2 | 756 - 1813 | 1001 - 3005 |
|  | 3 | 1814 - 3530 | 3006 - 5172 |
|  | 4 | 3531 - 4965 | 5173 - 6255 |
|  | 5 | 4966 - 5909 | 6256 - 7436 |
|  | 6 | 5910 - 6275 | 7437 - 8616 |
|  | 7 | 6276 - 7007 | 8617+ |
|  | 8 | 7008 - 7913 |  |
|  | 9 | 7914 - 8953 |  |
|  | 10 | 8954+ |  |
